# Supplementary material for: Prolonging the antibacterial activity of nanosilver-coated membranes through partial sulfidation
Source: Royal Society of Chemistry journal article supplement (doi:10.1039/d0en00300j), 2020-01-01
Supplement: d0en00300j1.pdf [file d0en00300j1.pdf]

## Supporting Information

### **Prolonging the antibacterial activity of nanosilver-coated membranes through partial sulfidation**

Ana C. Barrios<sup>1,2</sup>, Dianne Carrillo<sup>1,2</sup>, Tyson R. Waag<sup>1,2</sup>, Douglas Rice<sup>1,2</sup>, Yuqiang Bi<sup>1,2</sup>, Rafiqul Islam<sup>3</sup>, and François Perreault<sup>1,2\*</sup>

<sup>1</sup> School of Sustainable Engineering and the Built Environment, Arizona State University

<sup>2</sup> Nanosystems Engineering Research Center for Nanotechnology-Enabled Water Treatment, Arizona State University, Tempe, Arizona, United States

<sup>3</sup> Cactus Materials Inc., Tempe, Arizona, United States

\* Corresponding Author: Francois Perreault, francois.perreault@asu.edu

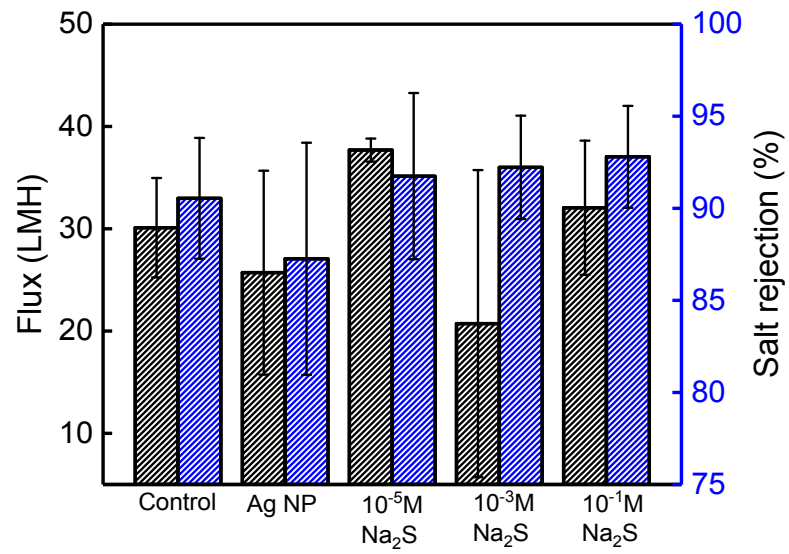

**Figure S1.** Permeate flux (black bars) and salt rejection (blue bars) of control and functionalized Ag membranes. The salt concentration used was 2000 mg/L and the TMP is 300 psi.

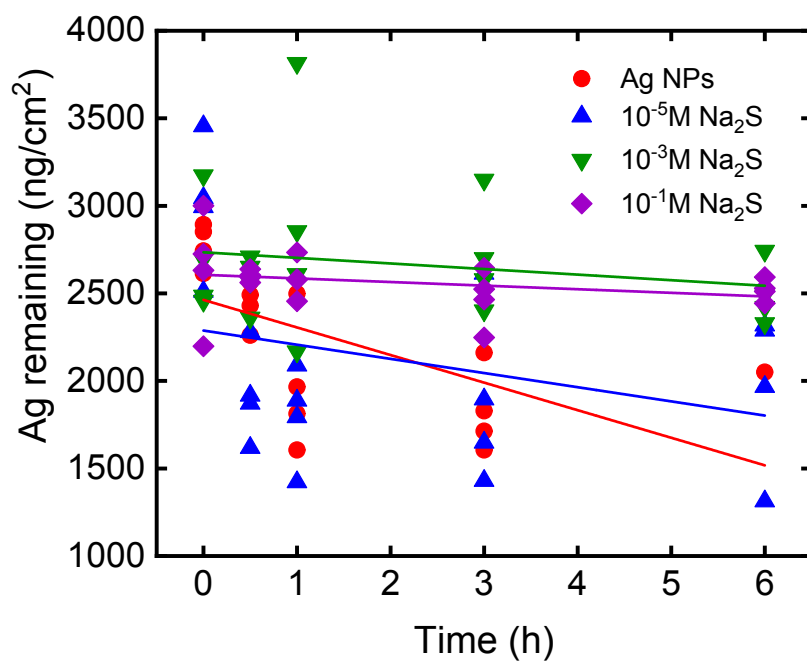

**Figure S2.** Mass of silver remaining on Ag NPs membrane and sulfidized membranes. The silver remaining measurements were done by ICP-MS of three individual acid digested membranes. The slope of each line is the average rate of dissolution (n=3 per time point).
